# Supplementary material
Source: HighWire-hosted journal article supplement (https://gh.bmj.com/content/9/1/e013070)

## Supplementary material 2 Respondents' bid paths

## Scenario A: treatment for chronic diseases

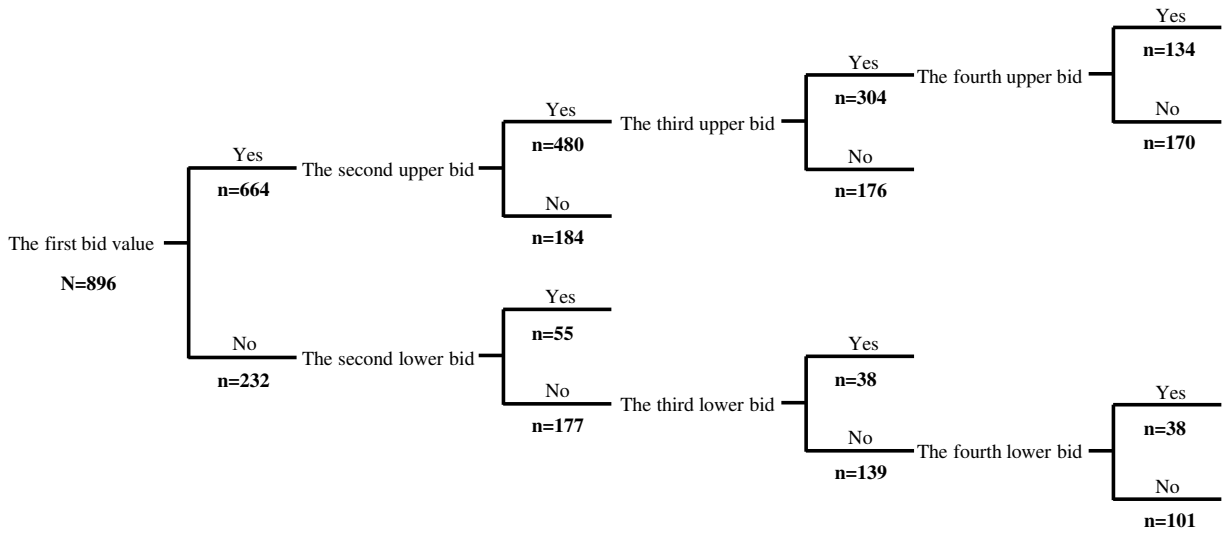

## Scenario B: treatment for rare diseases

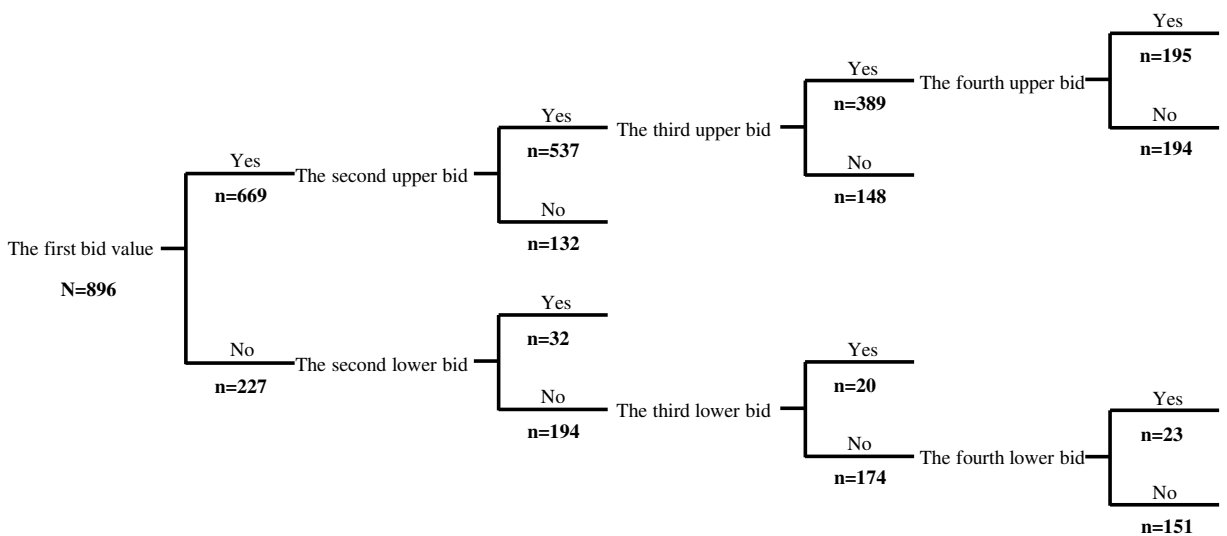

## Scenario C: treatment for terminal diseases

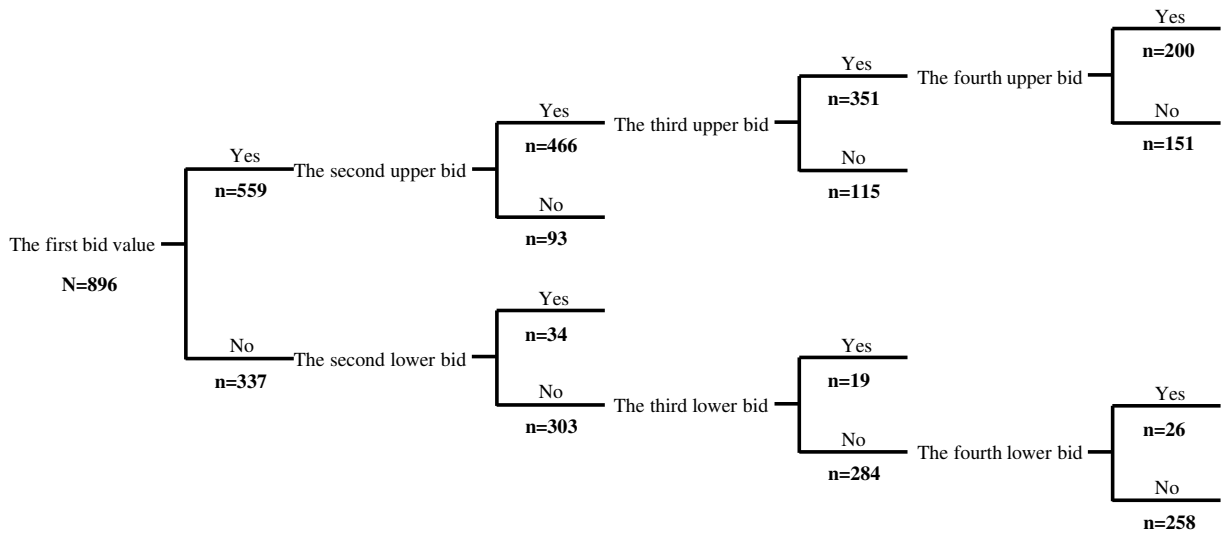

Supplement: inline-supplementary-material-2 [file inline-supplementary-material-2.pdf]
